# Supplementary material for: The role of CYP2D in rat brain in methamphetamine-induced striatal dopamine and serotonin release and behavioral sensitization
Source: PubMed Central journal article supplement (PMC8233297; doi:10.1007/s00213-021-05808-9), 2021-03-01

## The role of CYP2D in rat brain in methamphetamine-induced striatal dopamine and serotonin release and behavioral sensitization

Marlaina R Stocco, Ahmed A El-Sherbeni, Bin Zhao, Maria Novalen, Rachel F Tyndale

Corresponding author: Dr. Rachel F Tyndale

Departments of Pharmacology & Toxicology, Psychiatry, University of Toronto

Email address: r.tyndale@utoronto.ca

**Online Resource 1** Propranolol (versus vehicle) pretreatment had no effect on serum drug concentrations. Rats were given propranolol (n = 3 ICV, 3 IST) or vehicle (n = 3 ICV, 3 IST) pretreatment 20 hr prior to a single MAMP injection, and blood samples were taken at 100 and 130 min after injection (Experiment 2). Serum (a) MAMP and (b) AMP, and the (c) AMP/MAMP ratio, did not differ between pretreatments. OH-MAMP concentrations in serum were below the LOQ in most samples and are not reported here. Veh, vehicle; Prl, propranolol; SD, standard deviation.

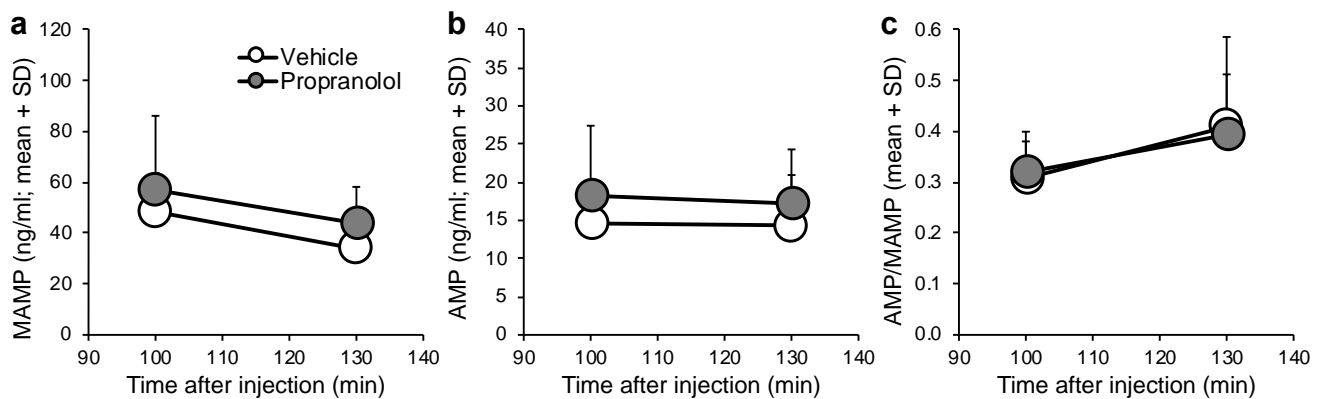

Supplement: 213_2021_5808_MOESM1_ESM.pdf [file 213_2021_5808_MOESM1_ESM.pdf]
