# Supplementary material for: The role of CYP2D in rat brain in methamphetamine-induced striatal dopamine and serotonin release and behavioral sensitization
Source: PubMed Central journal article supplement (PMC8233297; doi:10.1007/s00213-021-05808-9), 2021-03-01

## The role of CYP2D in rat brain in methamphetamine-induced striatal dopamine and serotonin release and behavioral sensitization

Marlaina R Stocco, Ahmed A El-Sherbeni, Bin Zhao, Maria Novalen, Rachel F Tyndale

Corresponding author: Dr. Rachel F Tyndale

Departments of Pharmacology & Toxicology, Psychiatry, University of Toronto

Email address: r.tyndale@utoronto.ca

**Online Resource 4** Day 1 dopamine and serotonin did not correlate with serum MAMP and AMP.

Rats were given ICV propranolol or vehicle pretreatment 20 hr prior to 7 daily MAMP sessions; IST microdialysis was conducted, and blood samples were collected on day 1 and day 7 (Experiment 3).

Day 1 dopamine AUC<sub>0-75</sub> did not correlated with day 1 serum (a) MAMP or (b) AMP concentrations assessed at 100 min. Day 1 serotonin AUC<sub>0-75</sub> did not correlated with serum (c) MAMP or (d) AMP concentrations assessed at 100 min. Correlations were assessed with pretreatment groups combined, and AMP concentrations below the LOQ were excluded (MAMP data in (a,c): n = 8 propranolol, 7 vehicle; AMP data in (b,d): n = 6 propranolol, 6 vehicle).

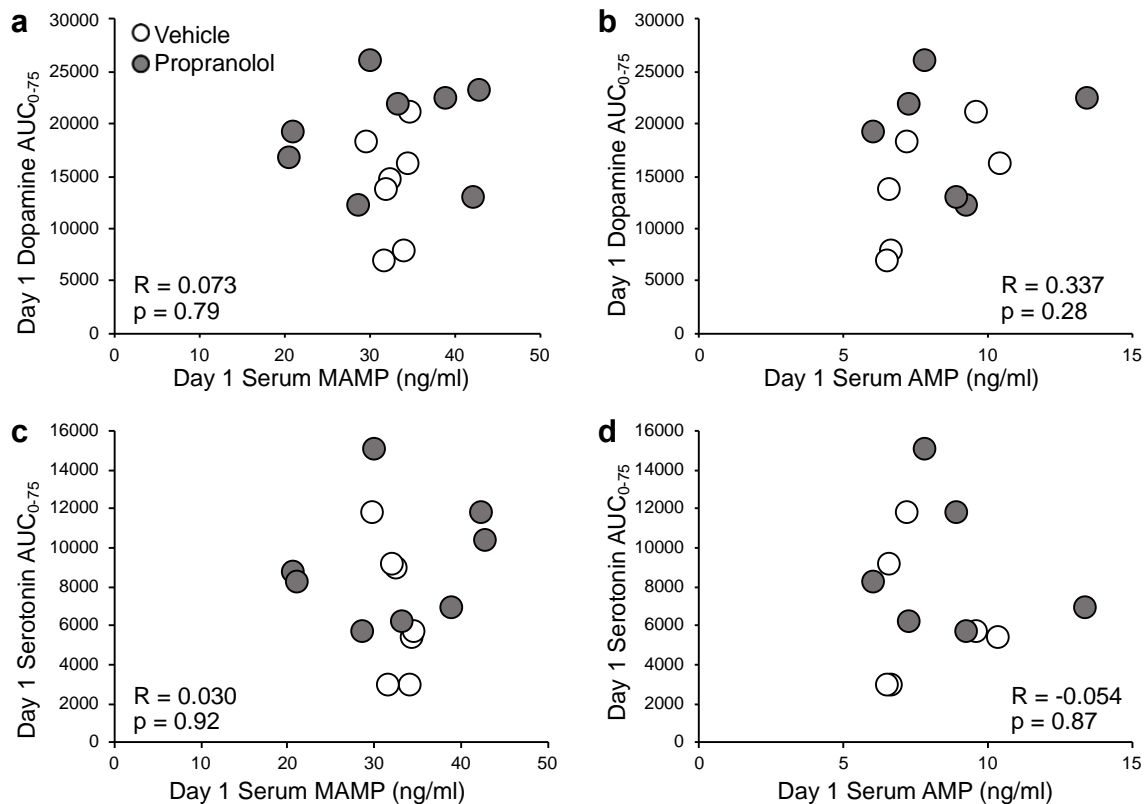

Supplement: 213_2021_5808_MOESM4_ESM.pdf [file 213_2021_5808_MOESM4_ESM.pdf]
