# Supplementary material for: The role of CYP2D in rat brain in methamphetamine-induced striatal dopamine and serotonin release and behavioral sensitization
Source: PubMed Central journal article supplement (PMC8233297; doi:10.1007/s00213-021-05808-9), 2021-03-01

### The role of CYP2D in rat brain in methamphetamine-induced striatal dopamine and serotonin release and behavioral sensitization

Marlaina R Stocco, Ahmed A El-Sherbeni, Bin Zhao, Maria Novalen, Rachel F Tyndale

Corresponding author: Dr. Rachel F Tyndale

Departments of Pharmacology & Toxicology, Psychiatry, University of Toronto

Email address: r.tyndale@utoronto.ca

**Online Resource 6** Stereotypy time on day 7 correlated with day 1, but not day 7, dopamine and serotonin. Rats were given ICV propranolol or vehicle pretreatment 20 hr prior to 7 daily MAMP sessions; stereotypy response was recorded daily from 30-50 min after injection, and IST microdialysis was conducted on day 1 and on day 7 (Experiment 3). Total stereotypy time on day 7 correlated with day 1 (a) dopamine and (b) serotonin AUC<sub>0-75</sub>, but it did not correlate with day 7 (c) dopamine or (d) serotonin AUC<sub>0-75</sub>. Correlations were assessed with pretreatment groups combined (day 1 data in (a,b): n = 8 propranolol, 7 vehicle; day 7 data in (c,d): n = 6 propranolol, 8 vehicle).

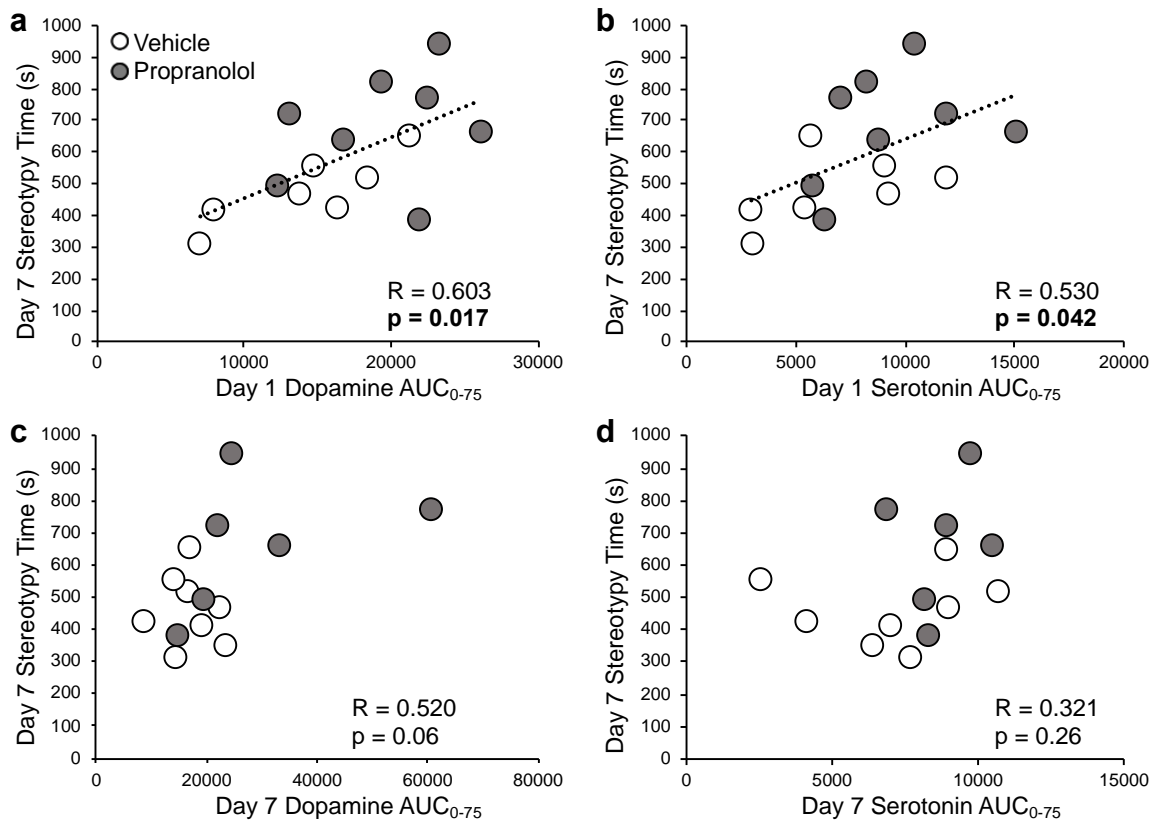

Supplement: 213_2021_5808_MOESM6_ESM.pdf [file 213_2021_5808_MOESM6_ESM.pdf]
