# Supplementary material for: The role of CYP2D in rat brain in methamphetamine-induced striatal dopamine and serotonin release and behavioral sensitization
Source: Psychopharmacology (Berl). 2021 Mar 1;238(7):1791–804. doi: 10.1007/s00213-021-05808-9 (PMC8233297; doi:10.1007/s00213-021-05808-9)

## The role of CYP2D in rat brain in methamphetamine-induced striatal dopamine and serotonin release and behavioral sensitization

Marlaina R Stocco, Ahmed A El-Sherbeni, Bin Zhao, Maria Novalen, Rachel F Tyndale

Corresponding author: Dr. Rachel F Tyndale

Departments of Pharmacology & Toxicology, Psychiatry, University of Toronto

Email address: r.tyndale@utoronto.ca

**Online Resource 5** Stereotypy slope did not correlate with the day 1 to 7 change in dopamine and serotonin. Rats were given ICV propranolol or vehicle pretreatment 20 hr prior to 7 daily MAMP sessions; stereotypy response was recorded daily from 30-50 min after injection, and IST microdialysis was conducted on day 1 and on day 7 (Experiment 3). The slope of stereotypy time across sessions did not correlate with the change in (a) dopamine and (b) serotonin AUC<sub>0-75</sub>, or with the change in the (c) sum of dopamine and serotonin AUC<sub>0-75</sub> from day 1 to day 7. Correlations were assessed with pretreatment groups combined (n = 6 propranolol, 7 vehicle).

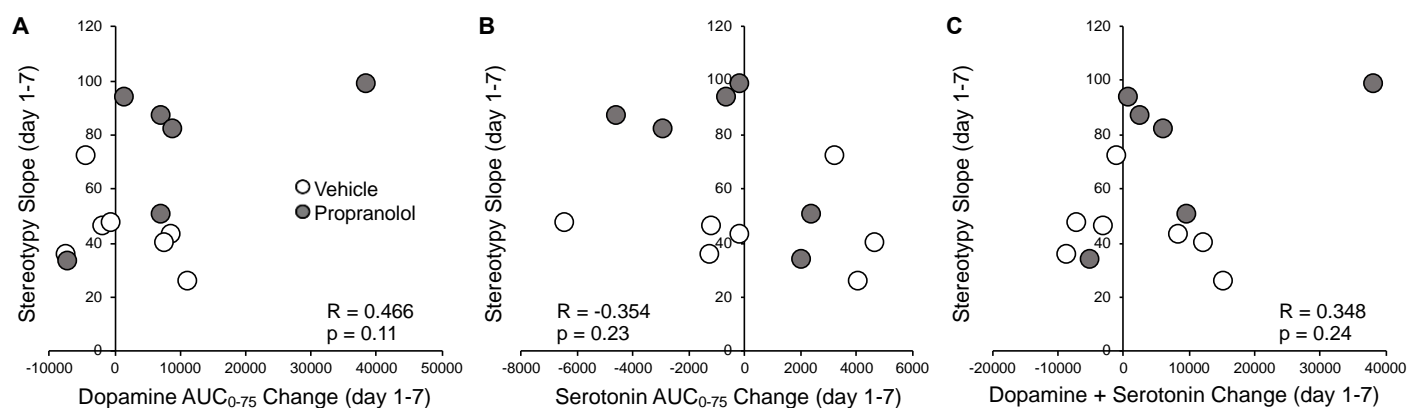

Supplement: Supplementary file 5 — (PDF 35 kb) [file 213_2021_5808_MOESM5_ESM.pdf]
